# Supplementary material for: In situ surface engineering of ultrafine Ni2P nanoparticles on cadmium sulfide for robust hydrogen evolution
Source: Royal Society of Chemistry journal article supplement (doi:10.1039/c8cy00519b), 2018-01-01
Supplement: c8cy00519b1.pdf [file c8cy00519b1.pdf]

## Supporting Information

### **In-situ surface engineering of ultrafine Ni<sub>2</sub>P nanoparticles on cadmium sulfide for robust hydrogen evolution**

**Junfang Wang, Peifang Wang\*, Jun Hou, Jin Qian, Chao Wang, Yanhui Ao\***

Key Laboratory of Integrated Regulation and Resource Development on Shallow Lakes, Ministry of Education, College of Environment, Hohai University, No.1, Xikang road, Nanjing, 210098, China

---

\* Corresponding author. Tel./ fax: +86 25 83787330,

E-mail address: [andyao@hhu.edu.cn](mailto:andyao@hhu.edu.cn) (Yanhui Ao), [pfwang2005@hhu.edu.cn](mailto:pfwang2005@hhu.edu.cn) (Peifang Wang)

Table S1 Comparison of photocatalytic H<sub>2</sub> evolution activities of CdS-based photocatalysts.

| catalyst                                                 | Light source<br>(wavelength) | Scavenger                                             | H <sub>2</sub> evolution                        |           |           |
|----------------------------------------------------------|------------------------------|-------------------------------------------------------|-------------------------------------------------|-----------|-----------|
|                                                          |                              |                                                       | rate<br>(mmol g <sup>-1</sup> h <sup>-1</sup> ) | AQY(%)    | Ref.      |
| Ni/CdS                                                   | ≥420 nm                      | TEOA                                                  | 0.471                                           | Not given | [1]       |
| Ni <sub>2</sub> P@CdS                                    | ≥430 nm                      | None                                                  | 0.838                                           | 3.89      | [2]       |
| FeP/CdS                                                  | ≥420 nm                      | lactic acid                                           | 21.6                                            | Not given | [3]       |
| CdS/ZnS                                                  | ≥420 nm                      | Na <sub>2</sub> S-Na <sub>2</sub> S<br>O <sub>3</sub> | 0.792                                           | Not given | [4]       |
| 3D NiO-CdS                                               | ≥420 nm                      | Na <sub>2</sub> S-Na <sub>2</sub> S<br>O <sub>3</sub> | 0.745                                           | 6.02      | [5]       |
| MoS <sub>2</sub> /CdS                                    | ≥420 nm                      | Na <sub>2</sub> S-Na <sub>2</sub> S<br>O <sub>3</sub> | 4.77                                            | Not given | [6]       |
| TiO <sub>2</sub> -CdS@g-C <sub>3</sub> N <sub>4</sub>    | ≥420 nm                      | Na <sub>2</sub> S-Na <sub>2</sub> S<br>O <sub>3</sub> | 1.504                                           | 11.9      | [7]       |
| Ni(OH) <sub>2</sub> -CdS/g-C <sub>3</sub> N <sub>4</sub> | ≥420 nm                      | Na <sub>2</sub> S-Na <sub>2</sub> S<br>O <sub>3</sub> | 115.18                                          | 16.7      | [8]       |
| Cu <sub>2</sub> MoS <sub>4</sub> /CdS                    | ≥420 nm                      | lactic acid                                           | 15.56                                           | Not given | [9]       |
| CdS@Mo <sub>2</sub> C-C                                  | ≥420 nm                      | Na <sub>2</sub> S-Na <sub>2</sub> S<br>O <sub>3</sub> | 17.24                                           | Not given | [10]      |
| Ni <sub>2</sub> P-CdS                                    | ≥420 nm                      | Na <sub>2</sub> S-Na <sub>2</sub> S<br>O <sub>3</sub> | 34.9                                            | 21.7      | This work |

## References

[1] H. Yang, Z.L. Jin, K. Fan, D.D. Liu, G.X. Lu, The roles of Ni nanoparticles over CdS nanorods for improved photocatalytic stability and activity, Superlattices &

Microstructures, 111 (2017) 687-695.

[2] W. Zhen, X. Ning, B. Yang, Y. Wu, Z. Li, G. Lu, The enhancement of CdS photocatalytic activity for water splitting via anti-photocorrosion by coating Ni<sub>2</sub>P shell and removing nascent formed oxygen with artificial gill, *Applied Catalysis B Environmental*, 221 (2017) 243-257.

[3] J. Li, J. Lin, Facile fabrication of FeP/CdS for H<sub>2</sub> evolution, *Materials Letters*, 221 (2018) 289–292.

[4] Y.P. Xie, Z.B. Yu, G. Liu, X.L. Ma, H.M. Cheng, CdS–mesoporous ZnS core–shell particles for efficient and stable photocatalytic hydrogen evolution under visible light, *Energy & Environmental Science*, 7 (2014) 1895-1901.

[5] Z. Khan, M. Khannam, N. Vinothkumar, M. De, M. Qureshi, Hierarchical 3D NiO–CdS heteroarchitecture for efficient visible light photocatalytic hydrogen generation, *Journal of Materials Chemistry*, 22 (2012) 12090-12095.

[6] J.H. Xiong, Y.H. Liu, D.K. Wang, S.J. Liang, W.M. Wu, L. Wu, An efficient cocatalyst of defect-decorated MoS<sub>2</sub> ultrathin nanoplates for the promotion of photocatalytic hydrogen evolution over CdS nanocrystal, *Journal of Materials Chemistry A*, 3 (2015) 12631-12635.

[7] Z.F. Jiang, K. Qian, C.Z. Zhu, H.L. Sun, W.M. Wan, J.M. Xie, H.M. Li, P.K. Wong, S.Q. Yuan, Carbon nitride coupled with CdS-TiO<sub>2</sub> nanodots as 2D/0D ternary composite with enhanced photocatalytic H<sub>2</sub> evolution: A novel efficient three-level electron transfer process, *Applied Catalysis B Environmental*, 210 (2017) 194-204.

[8] Z. Yan, Z. Sun, X. Liu, H. Jia, P. Du, Cadmium sulfide/graphitic carbon nitride heterostructure nanowire loading with a nickel hydroxide cocatalyst for highly efficient photocatalytic hydrogen production in water under visible light, *Nanoscale*, 8 (2016) 4748-4756.

- [9] S. Hong, D.P. Kumar, D.A. Reddy, J. Choi, T.K. Kim, Excellent photocatalytic hydrogen production over CdS nanorods via using noble metal-free copper molybdenum sulfide ( $\text{Cu}_2\text{MoS}_4$ ) nanosheets as co-catalysts, *Applied Surface Science*, 396 (2016) 421-429.
- [10] S.S. Yi, J.M. Yan, B.R. Wulan, Q. Jiang, Efficient visible-light-driven hydrogen generation from water splitting catalyzed by highly stable CdS@Mo<sub>2</sub>C-C core-shell nanorods, *Journal of Materials Chemistry A*, 5 (2017) 15862-15868.
